# Supplementary material for: Circulating Tumor DNA Analysis in Advanced Urothelial Carcinoma: Insights from Biological Analysis and Extended Clinical Follow-up
Source: PubMed Central journal article supplement — Clin Cancer Res. 2023 Oct 2;29(23):4797–807. doi: 10.1158/1078-0432.CCR-23-1860 (PMC10690087; doi:10.1158/1078-0432.ccr-23-1860), 2023-10-02
Supplement: ccr-23-1860_supplementary_figure_2_suppsf2.pdf [file ccr-23-1860_supplementary_figure_2_suppsf2.pdf]

Supplementary Figure 2. Longitudinal ctDNA data for NAC-naïve patient cohort

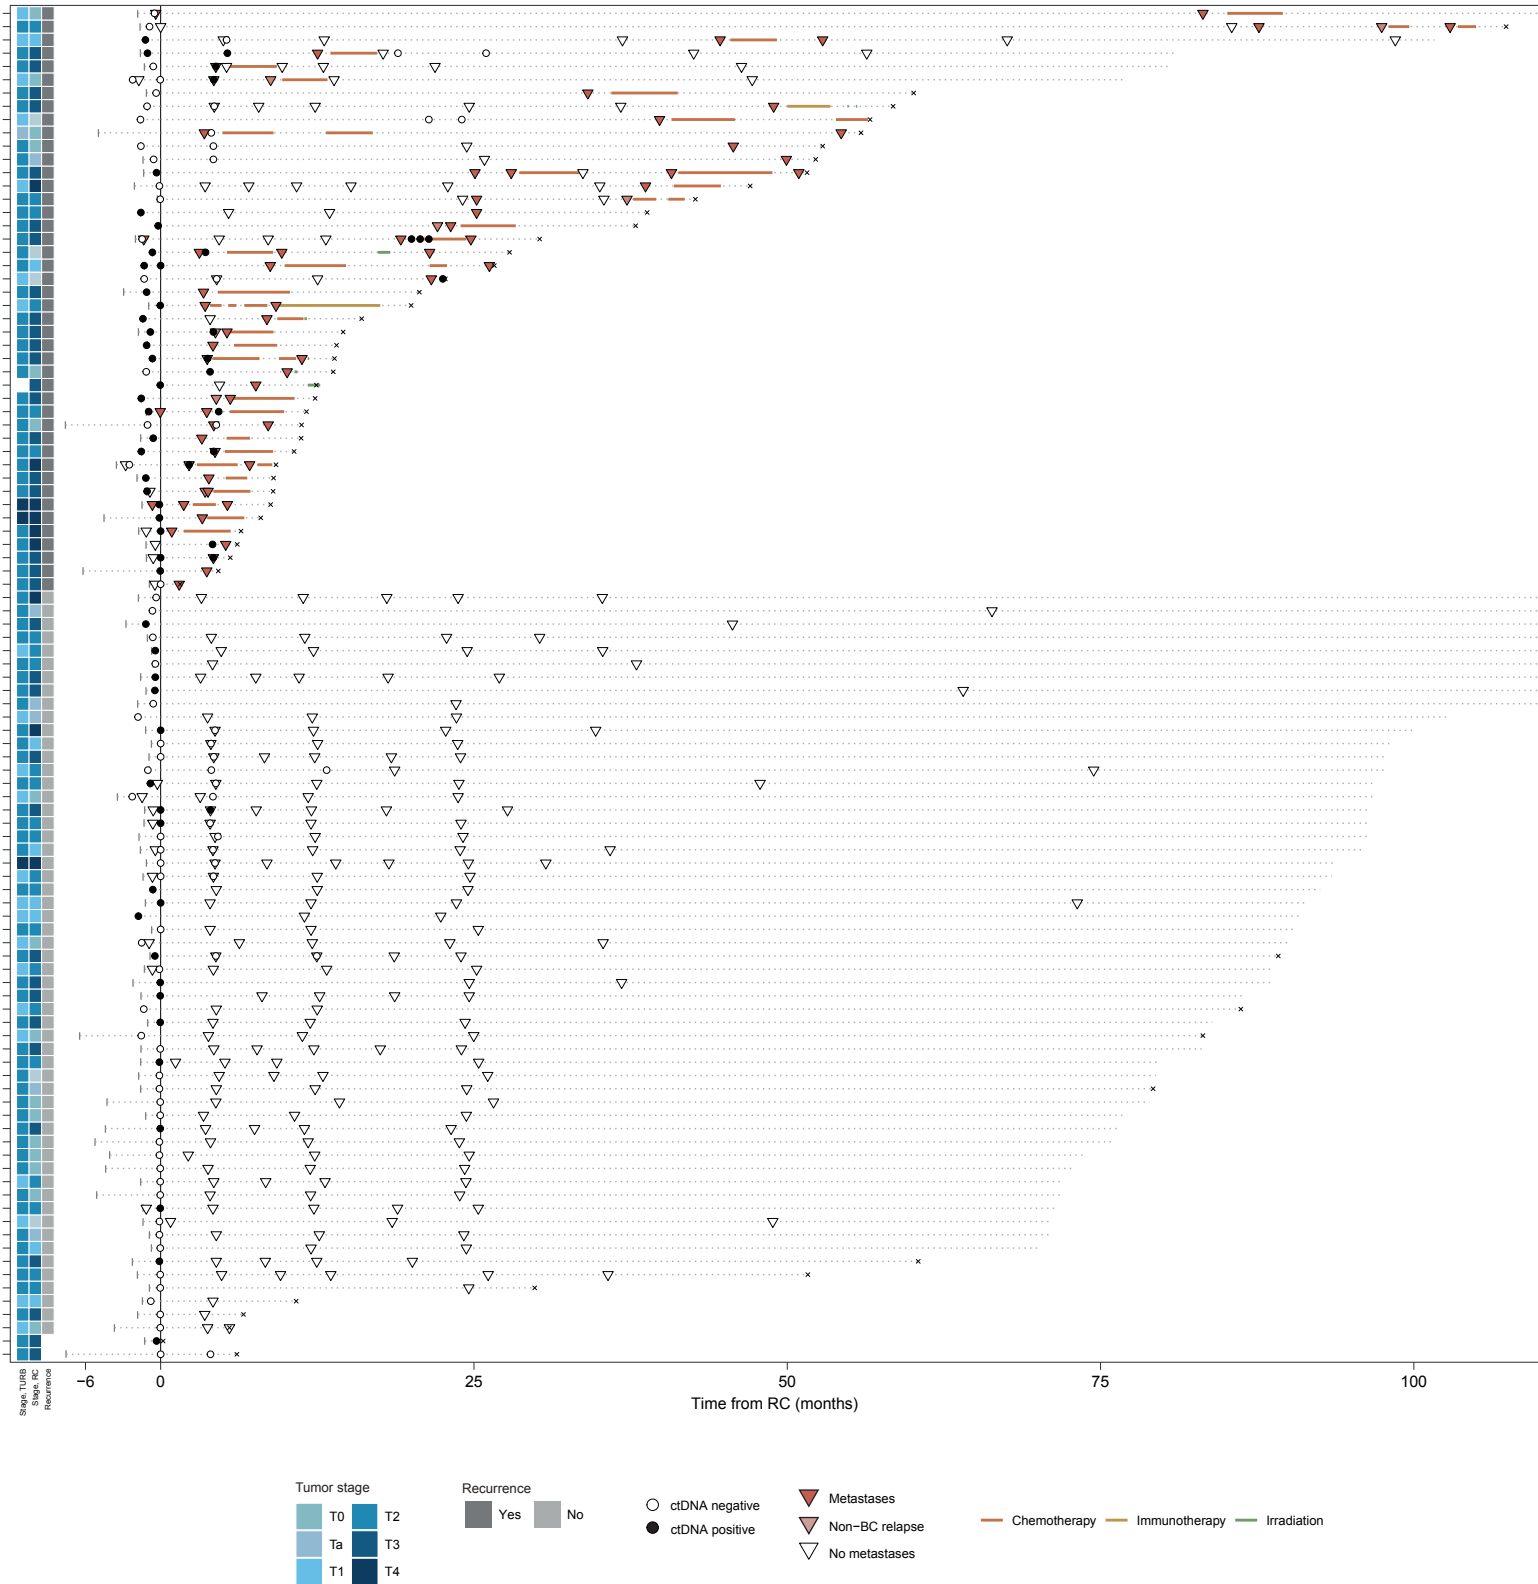

Longitudinal representation of circulating tumor DNA (ctDNA) results for analyzed samples in the NAC-naïve patient cohort (n=102). Patients are ordered by decreasing overall survival within patients with and without recurrence.
