# Supplementary material for: Circulating Tumor DNA Analysis in Advanced Urothelial Carcinoma: Insights from Biological Analysis and Extended Clinical Follow-up
Source: PubMed Central journal article supplement — Clin Cancer Res. 2023 Oct 2;29(23):4797–807. doi: 10.1158/1078-0432.CCR-23-1860 (PMC10690087; doi:10.1158/1078-0432.ccr-23-1860), 2023-10-02
Supplement: ccr-23-1860_supplementary_figure_3_suppsf3.pdf [file ccr-23-1860_supplementary_figure_3_suppsf3.pdf]

### Supplementary Figure 3. Quality metrics of plasma samples

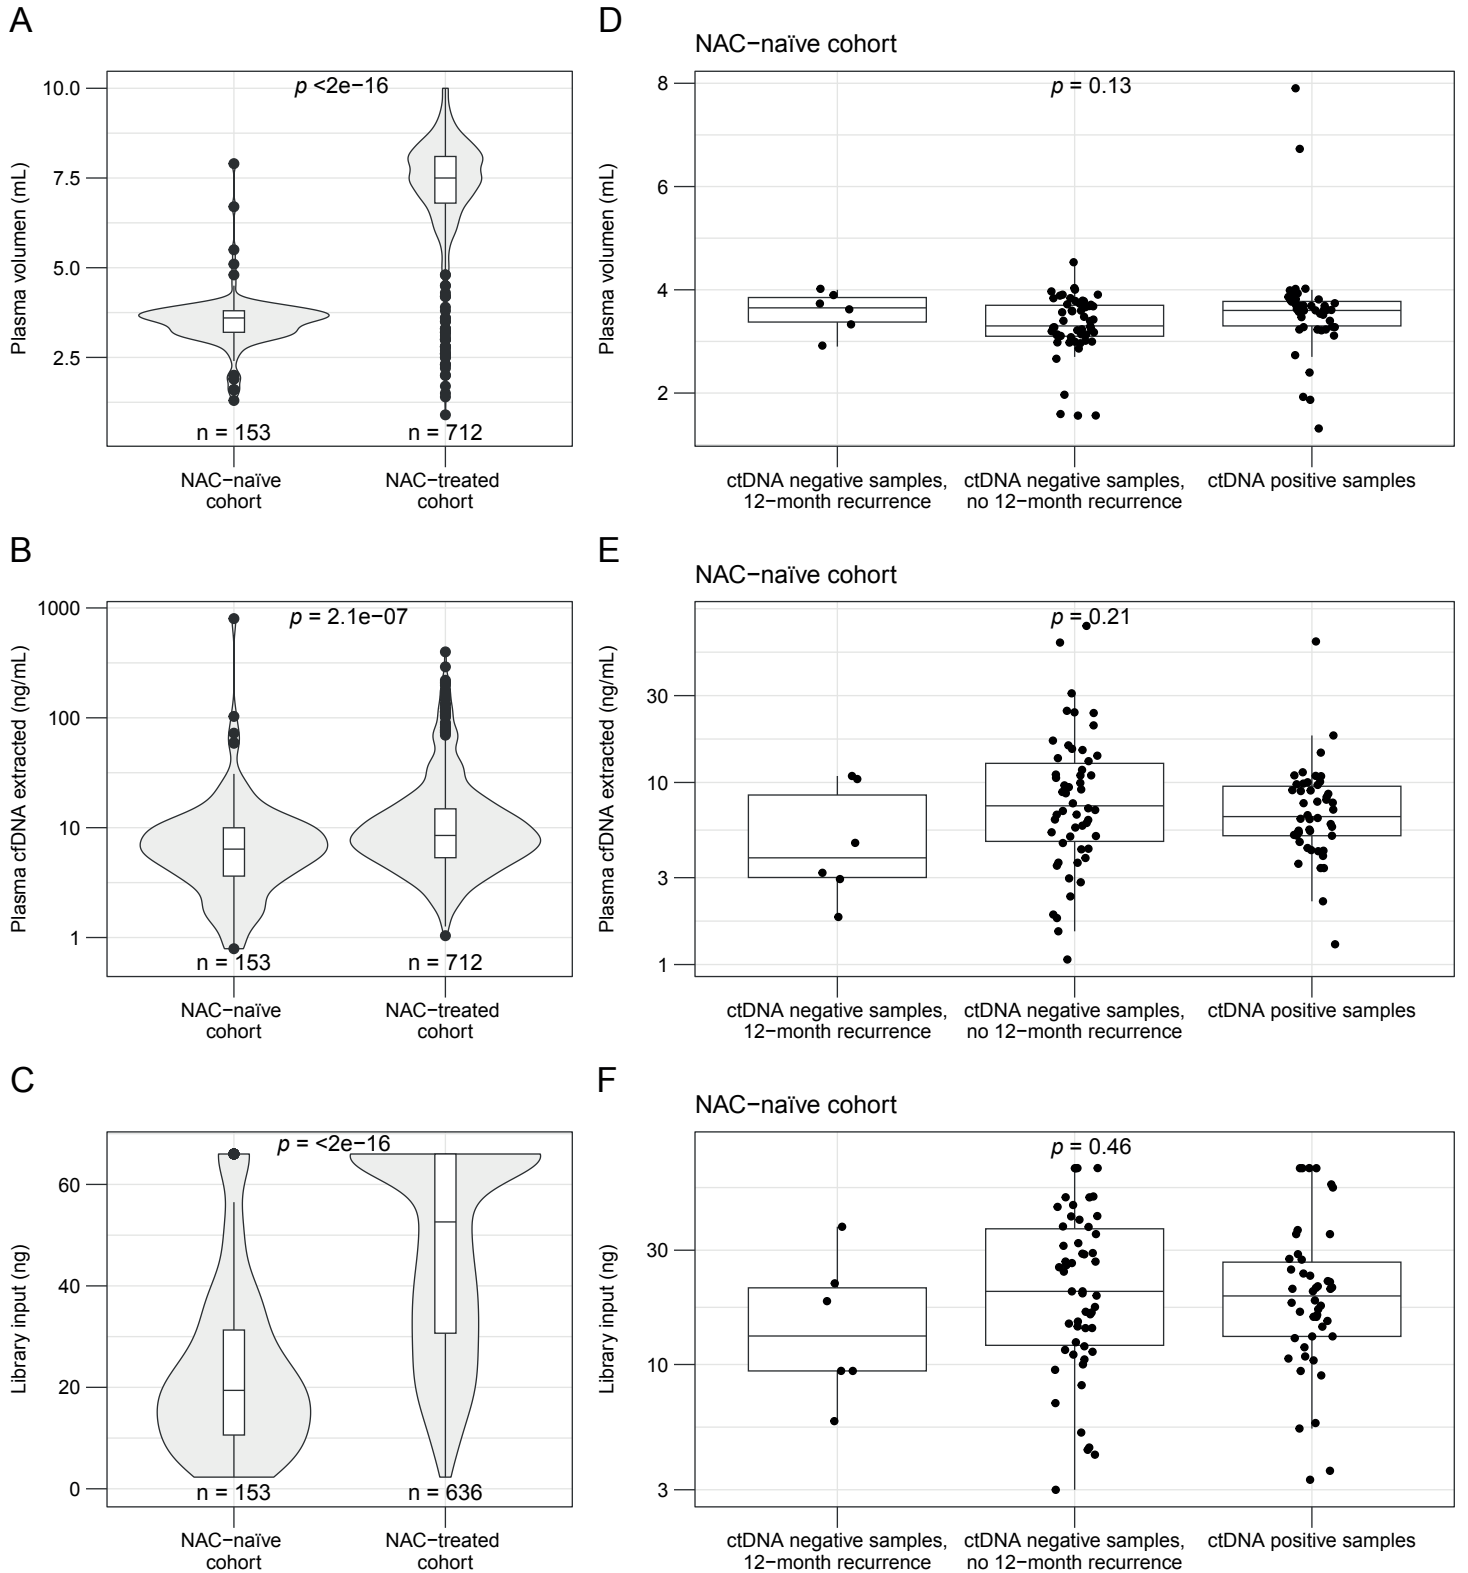

**A**, Plasma volume of analyzed samples in the NAC-treated and NAC-naïve cohorts. **B**, Amount of plasma cell-free DNA (cfDNA) extracted from samples in the NAC-treated and NAC-naïve cohorts. **C**, Library input for the NAC-treated and NAC-naïve cohorts. **D**, Plasma volume of analyzed samples collected before radical cystectomy (RC) in the NAC-naïve cohort separated by ctDNA status and whether the patient had metastatic relapse within 12 months after RC for ctDNA negative samples. **E**, Amount of cfDNA extracted from samples collected before RC in the NAC-naïve cohort separated by ctDNA status and whether the patient had metastatic relapse within 12 months after RC for ctDNA negative samples. **F**, Library input for samples collected before RC in the NAC-naïve cohort separated by ctDNA status and whether the patient had metastatic relapse within 12 months after RC for ctDNA negative samples.
