# Supplementary material for: Circulating Tumor DNA Analysis in Advanced Urothelial Carcinoma: Insights from Biological Analysis and Extended Clinical Follow-up
Source: PubMed Central journal article supplement — Clin Cancer Res. 2023 Oct 2;29(23):4797–807. doi: 10.1158/1078-0432.CCR-23-1860 (PMC10690087; doi:10.1158/1078-0432.ccr-23-1860), 2023-10-02
Supplement: ccr-23-1860_supplementary_table_1_suppst1.pdf [file ccr-23-1860_supplementary_table_1_suppst1.pdf]

**Supplementary Table 1.** Univariate- and multivariable cox regression analysis

| <b>Recurrence-free survival</b>                                |                 |                 |
|----------------------------------------------------------------|-----------------|-----------------|
|                                                                | HR (95% CI)     | <i>p</i> -value |
| <b>Univariate analysis</b>                                     |                 |                 |
| Pathological downstaging (no vs yes; n=65, 18 events)          | 9.2 (3.0-28.0)  | 0.0001          |
| ctDNA status before RC (positive vs negative; n=64, 17 events) | 15.2 (4.9-46.8) | <0.0001         |
| ctDNA clearance during NAC (no vs yes; n=24, 14 events)        | 6.5 (1.9-21.4)  | 0.002           |
| <b>Multivariable model 1 (n=64, 17 events)</b>                 |                 |                 |
| Pathological downstaging (no vs yes)                           | 4.9 (1.4-17.9)  | 0.015           |
| ctDNA status before RC (positive vs negative)                  | 5.4 (1.5-19.1)  | 0.009           |
| <b>Multivariable model 2 (n=24, 14 events)</b>                 |                 |                 |
| Pathological downstaging (no vs yes)                           | 2.0 (0.3-11.8)  | 0.46            |
| ctDNA clearance during NAC (no vs yes)                         | 4.7 (1.2-18.8)  | 0.029           |

HR = hazard ratio; CI = confidence interval; NAC = neoadjuvant chemotherapy; RC = radical cystectomy.
